# Supplementary material
Source: PubMed Central journal article supplement (PMC5377505)
Supplement: AEM.00028-17_zam999117759s1.pdf [file AEM.00028-17_zam999117759s1.pdf]

## SUPPLEMENTARY MATERIALS

**Supplementary Table S1:** Primers and probes used for the quantitative PCR (qPCR) assays

| Assays            | Target gene/region                  | Primer and probe sequences (5'-3')                                                                                            | Concentration (nM) | PCR Conditions                                                                                                   | References |
|-------------------|-------------------------------------|-------------------------------------------------------------------------------------------------------------------------------|--------------------|------------------------------------------------------------------------------------------------------------------|------------|
| ENT 23S rRNA      | 23S rRNA                            | F:AGA AAT TCC AAA CGA ACT TTG<br>R:CAG TGC TCT ACC TCC ATC ATT<br>P:FAM-TGG TTC TCT CCG AAA TAG CTT TAG GGC TA-TAMRA          | 500<br>500<br>400  | 95°C for 10 min, 40 cycles of 95°C for 15 s and 60°C for 2 min                                                   | 1          |
| <i>E. coli</i> H8 | Sodium/Hydrogen exchanger precursor | F:ACA GTC AGC GAG ATT CTT C<br>R:GAA CGT CAG CAC CAC CAA                                                                      | 400<br>400         | 95°C for 5 min, 40 cycles of 95°C for 10 s and 60°C for 30 s                                                     | 2          |
| HF183             | 16S rRNA                            | F:ATC ATG AGT TCA CAT GTC CG<br>R:TAC CCC GCC TAC TAT CTA ATG                                                                 | 300<br>300         | 95°C for 10 min, 40 cycles of 95°C for 30 s, 53 °C for 1 min and 60°C for 1 min                                  | 3, 4       |
| <i>nifH</i>       | <i>nifH</i>                         | F:GAAAGCGGAGGTCCTGAA<br>R:ACTGAAAAACCTCCGCAAAC<br>P:FAM-CCG GAC GTG GTG TAA CAG TAG CTA-BHQ-1                                 | 800<br>800<br>240  | 95°C for 10 min, 50 cycles of 95°C for 10 sec and 57°C for 30 s                                                  | 5          |
| HAdVs (A-F)       | Hexon                               | F:GCC ACG GTG GGG TTT CTA AAC TT<br>R:GCC CCA GTG GTC TTA CAT GCA CAT C<br>P:FAM-TGC ACC AGA CCC GGG CTC AGG TAC TCC GA-TAMRA | 200<br>200<br>200  | 95°C for 10 s, 45 cycles of 95°C for 10 s, 55°C for 10 s and 65°C for 1 min                                      | 6          |
| HPyVs             | Homologous T antigen                | F:AGT CTT TAG GGT CTT CTA CCT TT<br>R:GGT GCC AAC CTATGGAACAG<br>P:FAM-TCATCACTGGCAAACAT-MGBNFQ                               | 240<br>240<br>160  | 95°C for 10 min, 45 cycles of 95°C for 15 s, 55°C for 20 s and 60°C for 1 min                                    | 7          |
| PMMoVs            | Replication-associated protein      | F:GAG TGG TTT GAC CTT AAC GTT GA<br>R:TTG TCG GTT GCA ATG CAA GT<br>P:CCT ACC GAA GCA AAT G                                   | 200<br>200<br>80   | 50°C for 10 min, 95°C for 10 min, 45 cycles of 95°C for 30 s, 53°C for 1 min, 72°C for 1 min and 72°C for 10 min | 8, 9       |
| HAdVs 40/41       | Fibre gene                          | F:AAC TTT CTC TCT TAA TAG ACG CC<br>R:AGG GGG CTA GAA AAC AAA A<br>P:CTG ACA CGG GCA CTC TTC GC                               | 400<br>400<br>100  | 95°C for 10 min, 45 cycles of 95°C for 15 s, 55°C for 30 s and 72°C for 30 s                                     | 10         |
| HNoVs             | ORF1-ORF2 junction region           | F:CAA GAG TCA ATG TTT AGG TGG ATG AG<br>R:TCG ACG CCA TCT TCA TTC ACA<br>P:FAM-TGG GAG GGC GAT CGC AAT CT-BHQ                 | 250<br>250<br>100  | 50°C for 10 min, 95°C for 15 min, 45 cycles of 94°C for 10 s, 55°C for 20 s                                      | 11         |
| EVs               | 5' LTR                              | F:CCT CCG GCC CCT GAA TG<br>R:ACC GGA TGG CCA ATC CAA<br>P:FAM-CGG AAC CGA CTA CTT TGG GTG TCC GT-TAMRA                       | 300<br>900<br>125  | 50°C for 10 min, 95°C for 5 min, 45 cycles of 95°C for 1 min, 60°C for 30 s                                      | 12         |

**Supplementary Table S2:** Quantitative PCR (qPCR) performance characteristics determined from the slope of the standard curves

| qPCR assays       | qPCR performance characteristics        |                                                   |                  |
|-------------------|-----------------------------------------|---------------------------------------------------|------------------|
|                   | Amplification efficiencies ( <i>E</i> ) | Correlation coefficient ( <i>r</i> <sup>2</sup> ) | Slope            |
| ENT 23S rRNA      | 94.5 to 98.1                            | 0.999 to 1.000                                    | -3.410 to -3.418 |
| <i>E. coli</i> H8 | 93.5 to 98.1                            | 0.979 to 0.983                                    | -3.430 to -3.420 |
| HF183             | 86.9 to 101                             | 0.962 to 0.966                                    | -3.506 to -3.472 |
| <i>nifH</i>       | 90.0 to 92.8                            | 0.994 to 0.998                                    | -3.541 to -3.549 |
| HAdVs             | 98.1 to 104                             | 0.994 to 0.998                                    | -3.293 to -3.303 |
| HPyVs             | 96.9 to 107                             | 0.921 to 0.937                                    | -3.276 to -3.268 |
| PMMoVs            | 81.2 to 101                             | 0.945 to 0.976                                    | -3.301 to -3.872 |
| HAdVs 40/41       | 91.5 to 94.9                            | 0.986 to 0.988                                    | -3.493 to -3.591 |
| HNoVs             | 106 to 119                              | 0.983 to 0.986                                    | -2.931 to -3.193 |
| EVs               | 83.9 to 109                             | 0.985 to 0.995                                    | -3.465 to -3.869 |

*E*: Amplification efficiency =  $10^{(1/-\text{slope})/2}$ .

*r*<sup>2</sup>: denotes the correlation coefficient of determination representing the proportion of variability accounted for by the linear model

SD: Standard deviation

**Supplementary Table S3:** Environmental sampling site descriptions and potential sources of fecal pollution

| Site Name       | Description                                                      | Potential sources of fecal pollution |
|-----------------|------------------------------------------------------------------|--------------------------------------|
| Bribie Island   | White sandy public swimming beach                                | Storm water drain                    |
| Sandstone Point | White sandy beach adjacent to a small mangrove system            | Wastewater pumping station           |
| Godwin Beach    | White sandy beach                                                | Storm water drain                    |
| Deception Bay   | White sandy beach                                                | Storm water drain                    |
| Scarborough     | Yellow sandy beach adjacent to a public park                     | Storm water drain                    |
| Shorncliffe     | White sandy beach 200 m from a public access boat marina         | Storm water drain                    |
| Breakwater Park | Yellow sandy beach adjacent to a public picnic area              | Storm water drain                    |
| Pandanus Beach  | Popular swimming beach adjacent to a children's water playground | Storm water drain                    |
| Jabiru Island   | White sandy beach with a popular public swimming enclosure       | Storm water drain                    |
| Paradise Point  | White sandy beach with a popular public swimming enclosure       | Storm water drain                    |
| Labrador        | White sandy beach                                                | Storm water drain                    |
| Southport       | Yellow sandy beach adjacent to a popular public park             | Storm water drain                    |

## REFERENCES

1. **Haugland RA, Siefring SC, Wymer LJ, Brenner KP, Dufour AP.** 2005. Comparison of *Enterococcus* measurements in freshwater at two recreational beaches by quantitative polymerase chain reaction and membrane filter culture analysis. *Water Res* **39**:559–568.
2. **Gomi R, Matsuda T, Matsui Y, Yoneda M.** 2014. Fecal source tracking in water by next-generation sequencing technologies using host-specific *Escherichia coli* genetic markers. *Environ Sci Technol* **48**:9616-9623.
3. **Seurinck S, Defoirdt T, Verstraete W, Siciliano SD.** 2005. Detection and quantification of the human-specific HF183 *Bacteroides* 16S rRNA genetic markers with real-time PCR for assessment of human fecal pollution in freshwater. *Environ Microbiol* **7**:249–259.
4. **Bernhard AE, Field KG.** 2000. A PCR assay to discriminate human and ruminant feces on the basis of host differences in *Bacteroides-Prevotella* genes encoding 16S rRNA. *Appl Environ Microbiol* **66**: 4571–4574.
5. **Johnston C, Ufnar J, Griffith J, Gooch J, Stewart J.** 2010. A real-time qPCR assay for the detection of the *nifH* gene of *Methanobrevibacter smithii*, a potential indicator of sewage pollution. *J Appl Microbiol* **109**:1946-1956.
6. **Heim A, Ebnert C, Harste G, Pring-Akerblom P.** 2003. Rapid and quantitative detection of human adenovirus DNA by real-time PCR. *J Med Virol.* **70**:228-229.
7. **McQuaig S, Scott T, Lukasik J, Paul J, Harwood V.** 2009. Quantification of human polyomaviruses JC virus and BK virus by TaqMan quantitative PCR and comparison to other water quality indicators in water and fecal samples. *Appl Environ Microbiol* **75**:3379–3388.
8. **Rosario K, Symonds E, Sinigalliano C, Stewart J, Breitbart M.** 2009. Pepper mild mottle virus as an indicator of fecal Pollution. *Appl Environ Microbiol* **75**:7261-7267.
9. **Zhang, T., M. Breitbart, W. H. Lee, J. Q. Run, C. L. Wei, S. W. L. Soh, M. L. Hibberd, E. T. Liu, F. Rohwer, and Y. J. Ruan.** 2006. RNA viral community in human feces: prevalence of plant pathogenic viruses. *PLoS Biol.* **4**:e3.
10. **Ko G, Jothikumar N, Hill VR, Sobsey, MD.** 2005. Rapid detection of infectious adenoviruses by mRNA real-time RT-PCR. *J Virol Methods.* **127**:148–153.
11. **Jothikumar N, Lowther JA, Henshilwood K, Lees DN, Hill VR, Vinje J.** 2005. Quantitative real-time PCR assays for detection of human adenoviruses and identification of serotypes 40 and 41. *Appl Environ Microbiol* **71**:3131-3136.
12. **Cashdollar JL, Brinkman NE, Griffin SM, McMinn BR, Rhodes ER, Varughese EA, Grimm AC, Parshionikar SU, Wymer L, Fout GS.** 2013. Development and evaluation of EPA method 1615 for detection of enterovirus and norovirus in water. *Appl Environ Microbiol* **79**:215-223.
